# Supplementary material
Source: MDPI journal article supplement (https://www.mdpi.com/2297-8739/11/2/63)
Supplement: s1 [file s1]

Supporting Information for the Article:

# **Efficient Removal of Tetracycline by Metal-Organic Framework ZIF-67 and Its Mechanism**

**Shengyang Zheng <sup>1</sup>, Yaping Xu <sup>1</sup>, Xu Yao <sup>1,2</sup>, Chenzhe Wang <sup>1</sup>, Ping Liu <sup>1</sup>, Haitao Zhao <sup>1</sup>,  
Jianbing Lu <sup>1</sup> and Jing Ju <sup>1,\*</sup>**

<sup>1</sup> College of Environmental Science and Engineering, Yangzhou University, Yangzhou,  
Jiangsu 225127, China

<sup>2</sup> Jiangsu Longhuan Environmental Technology Co., Ltd, Changzhou, Jiangsu 225127, China

\* Correspondence: [jujing@yzu.edu.cn](mailto:jujing@yzu.edu.cn)

## Mapping and EDS

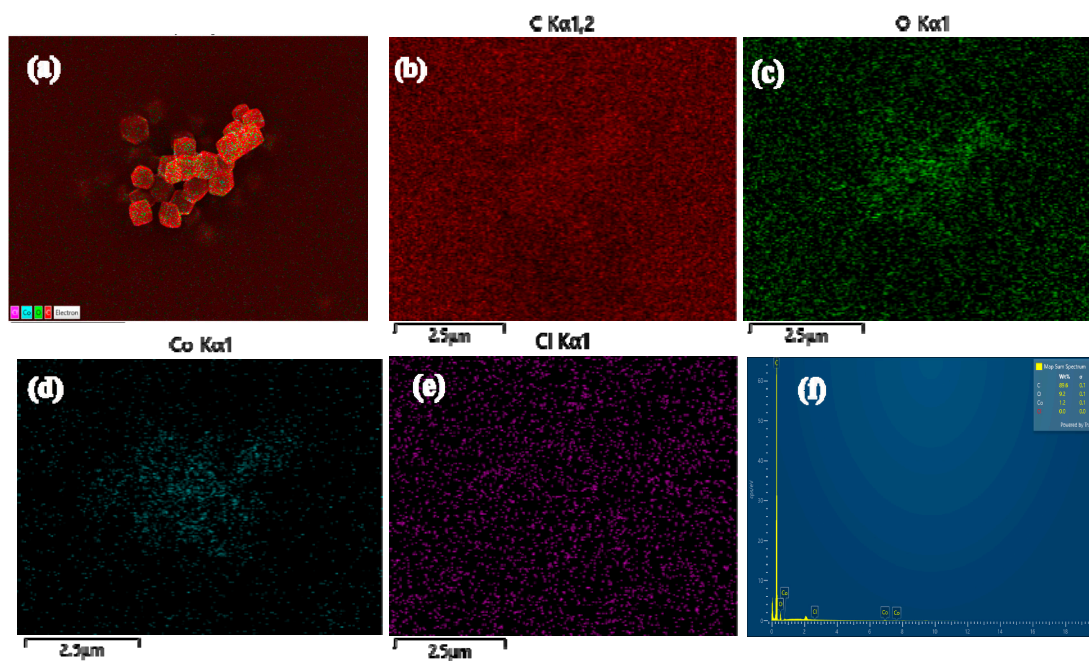

Figure S1 (a)-(f) Mapping plots and EDS plots of ZIF-67.

## FiStudy of minimum adsorbent dosage

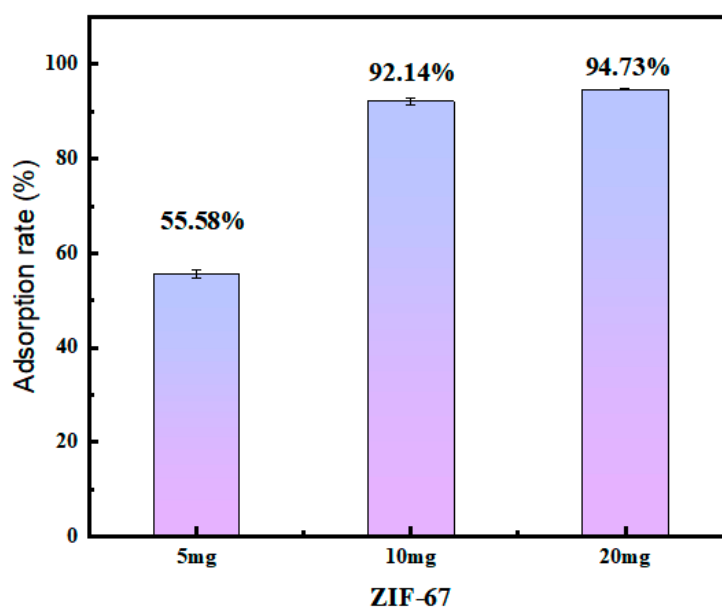

Figure S2. Effect of adsorbent dosage on removal rate (pH=4.5, 25°C,  $C_{tc}$ =50mg/L)

The results showed that the removal of tetracycline was increasing with the increase of adsorbent dosage .The removal rate of adsorbent dosage of 20mg is not much different from that of adsorbent of 10mg, so the minimum adsorbent dosage is 10mg.

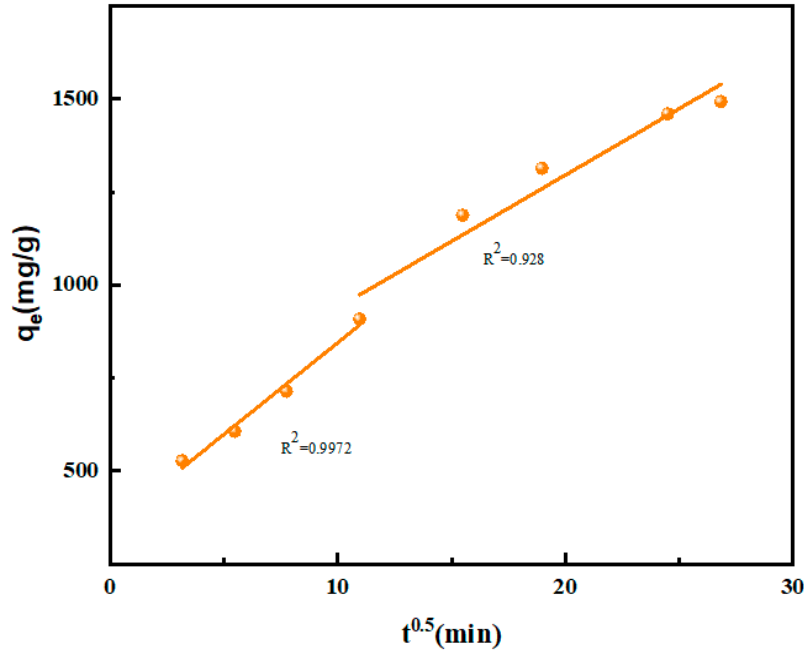

Figure S3. Intra particle diffusion model

### Thermodynamic analysis

The thermodynamics and spontaneity of the adsorption of ZIF-67 to TC were studied using changes in the standard free energy ( $\Delta G$ ), entropy ( $\Delta S$ ), and enthalpy ( $\Delta H$ ), calculated as Eq<sup>[1]</sup>:

$$K = \frac{q_e}{c_e} \quad (1)$$

$$\ln K = \Delta S/R - \Delta H/(RT) \quad (2)$$

$$\Delta G = \Delta H - T\Delta S \quad (3)$$

$q_e$  is the apparent adsorption of the adsorbent to the adsorbate at adsorption equilibrium, and  $c_e$  is the equilibrium concentration ( $\text{mol} \cdot \text{L}^{-1}$ ). Plotting  $\ln K$  against  $1/T$ , the slope and intercept of the line  $\Delta H$  and  $\Delta S$  are derived from Eq. (2). Combine with Eq. (3) to calculate  $\Delta G$  at different temperatures<sup>[2]</sup>.

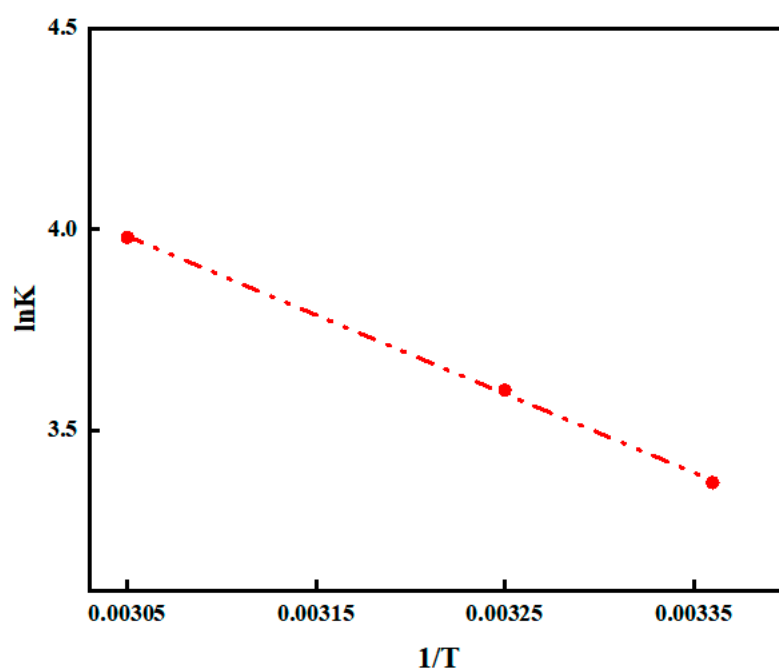

**Figure S4.** Effect of temperature on adsorption equilibrium constant

**Table S1.** Thermodynamics of TC adsorption on ZIF-67

| T (°C) | $\Delta G^\circ (\text{kJ} \cdot \text{mol}^{-1})$ | $\Delta H^\circ (\text{kJ} \cdot \text{mol}^{-1})$ | $\Delta S^\circ (\text{kJ} \cdot \text{mol}^{-1})$ |
|--------|----------------------------------------------------|----------------------------------------------------|----------------------------------------------------|
| 298K   | -8.126                                             | 16.3                                               | 0.082                                              |
| 308K   | -9.551                                             |                                                    |                                                    |
| 308K   | -10.047                                            |                                                    |                                                    |

## References

- [1] ZHAO J, GAO F, SUN Y, et al. New use for biochar derived from bovine manure for tetracycline removal [J]. Journal of Environmental Chemical Engineering, 2021, 9(4): 105585.

- [2] JAIN C K. Adsorption of zinc onto bed sediments of the River Ganga: adsorption models and kinetics [J]. Hydrological Sciences Journal, 2001, 46(3): 419-34.
